# Supplementary material for: Trace element determination in high-salinity water using an online ion imprinted helical tube demineralizer combined with ICP-MS
Source: Royal Society of Chemistry journal article supplement (doi:10.1039/d0ja00060d), 2020-01-01
Supplement: d0ja00060d1.pdf [file d0ja00060d1.pdf]

## Supporting information

### Trace metal determination in high-salinity water using ion imprinted helical tube demineralizer on-line combined with ICP-MS

#### Contents

SI-1 Preparation of the ion imprinted material

SI-2 ICP-MS operating conditions

SI-3 The LOD of iCAP Q before the use of the desalination device

SI-4 Trueness of the metal ion concentrations determined in the presence of different salt matrix concentrations before the desalination device was used

SI-5 Recoveries of the analytes in the presence of different salt matrices before and after the desalination device was used

SI-6 Determination results, RSDs and spike recoveries of real samples with the desalination device

SI-7 Determination results of real sample No.1 measured by EXPEC 7000 with the desalination device

SI-8 Determination results of standard sample CASS-5 measured by EXPEC 7000 with the desalination device

#### SI-1. Preparation of the ion imprinted material

The ingredients for preparing the ion imprinted polymer include imprint ions, a silicon source, a silane coupling agent, a surfactant, and a templating agent. Ion imprinted polymers can be synthesized using step-by-step or one-step methods. In this study, a one-step synthesis method named the “evaporation induced by self-assembly” method was used. In this method, a silicon source in an organic solvent (e.g., ethanol, acetonitrile, or another protonated solvent) was hydrolyzed in an acidic system. The produced oligosilicates interacted with surfactant molecules in the solvent, and the silicon material formed crosslinks and polymerizes as the solvent evaporates. A mesoporous structure rapidly assembled with the surfactant acting as a template for the mesopores. The polymer was then calcined or the template agent was removed in another way.

A specified amount of calcium nitrate, magnesium nitrate, or sodium nitrate was added to 100 mL of distilled water. The mixture was stirred for 1 h until the salt was

fully dissolved. The silane coupling agent 3-aminopropyl triethoxysilane (6.2 g) was added to 250 mL absolute ethanol and the mixture was stirred at 120 rpm for 1 h at 45°C until the agent was completely dissolved. While the liquid was still being stirred, 2.3 g of 25% (by weight) tetramethyl ammonium hydroxide was added dropwise. The templating agent polyethylene glycol (4.4 g) was added to 250 mL absolute ethanol and the mixture was stirred at 120 rpm for 1 h at 45°C until the agent was completely dissolved, then the solution was allowed to stand for 1 h. Equal amounts of the three solutions described above were mixed, and 200 mL of the silicon source tetraethyl orthosilicate was added, then the mixture was allowed to stand for 24 h. The mixture was then ultrasonicated for 1 h to volatilize the solvent. The product was transferred to a stainless steel autoclave lined with Teflon, and then heated to 100°C for 48 h to crystallize the product. The mixture was cooled and the product was separated using a suction filter system and then washed with distilled water and dried at 60°C for 20 h. A 2 g aliquot of the dried product was extracted by Soxhlet extraction with 400 mL of acidified ethanol (250 mL ethanol and 16 mL 36% (by weight) concentrated hydrochloric acid) for 24 h. The mixture was then neutralized by adding NaHCO<sub>3</sub> solution, and the product was filtered, washed until the washings were neutral, and dried in vacuo at 80°C for 24 h. The dried product was ground and stored in a desiccator. Processing the calcium nitrate, magnesium nitrate, and sodium nitrate this way gave the products Ca(II)-IIP, Mg(II)-IIP, and Na(I)-IIP, respectively.

## SI-2. ICP-MS operating conditions

**Table S1** iCAP Q operating conditions

| <b>Instrument parameter name</b> | <b>value</b>            |
|----------------------------------|-------------------------|
| RF power                         | 1500KW                  |
| Plasma gas (Ar) flow rate        | 15 L min <sup>-1</sup>  |
| Auxiliary gas flow rate          | 1.2 L min <sup>-1</sup> |
| Nebulizer gas flow rate          | 0.9 L min <sup>-1</sup> |



#### SI-4 Trueness of the metal ion concentrations determined in the presence of different salt matrix concentrations before the desalination device was used

It can be seen from Fig. S1 that the trueness of the metal ion concentrations determined in the absence of a salt matrix before the desalination device was used were <5% but that the trueness ~~were~~ was 5%–1000% when the salt matrix concentrations were 40–120 mg/L. The trueness increased as the salt matrix concentration increased when the desalination device was not used.

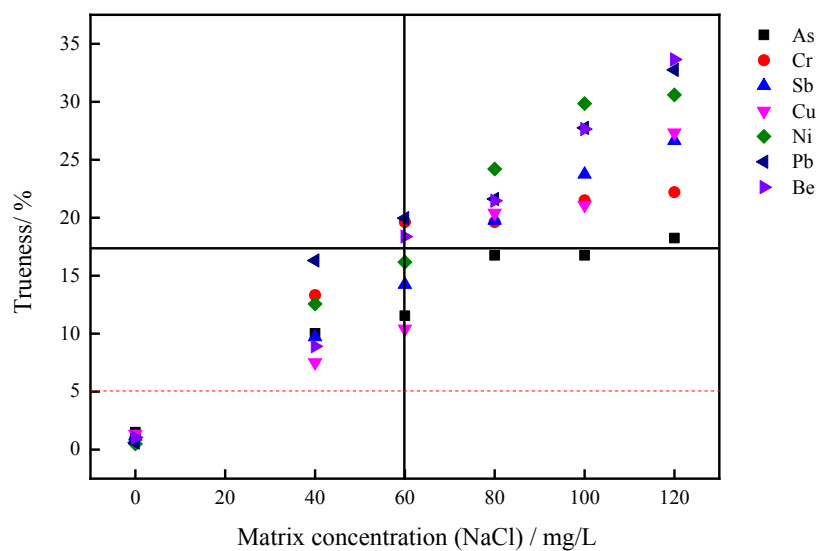

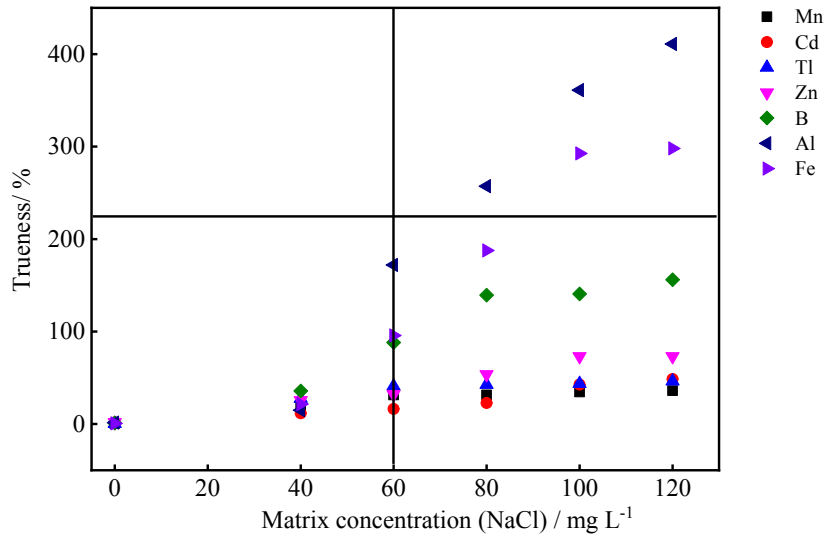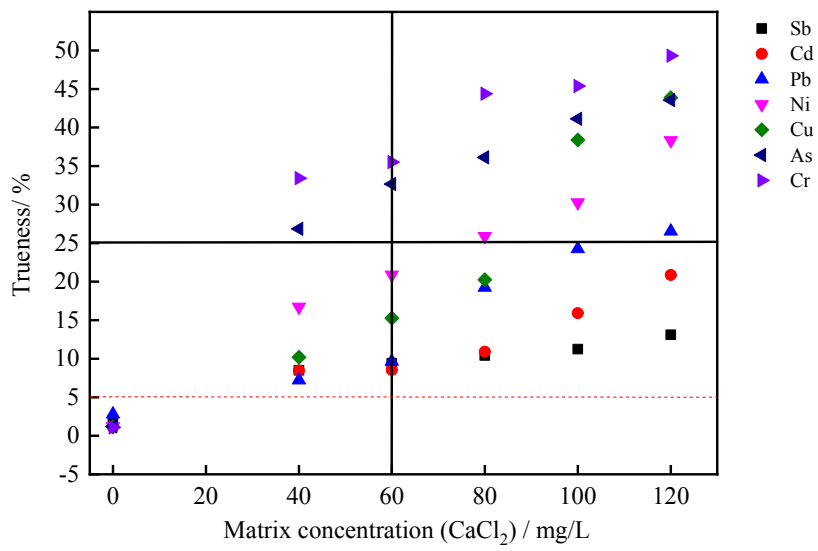

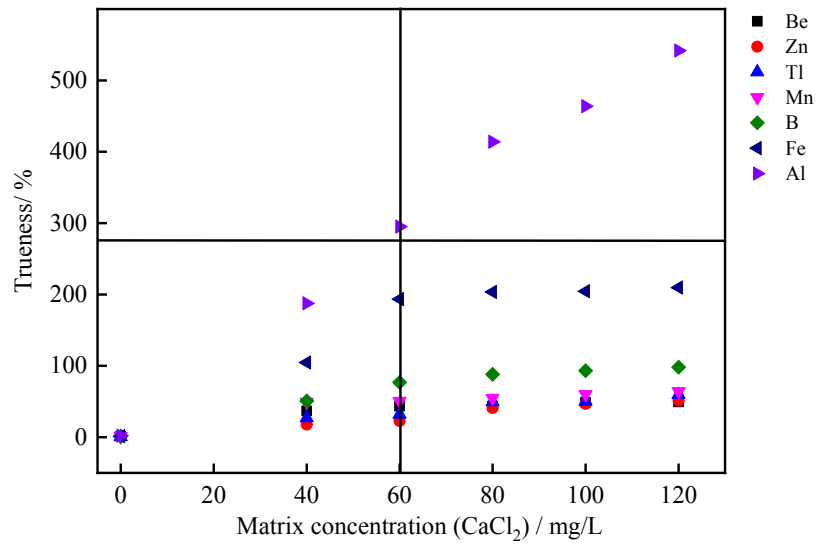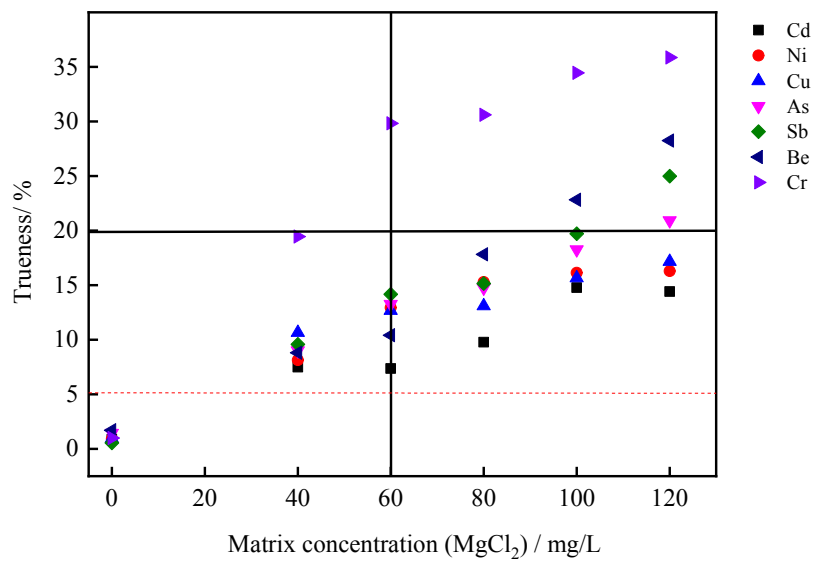

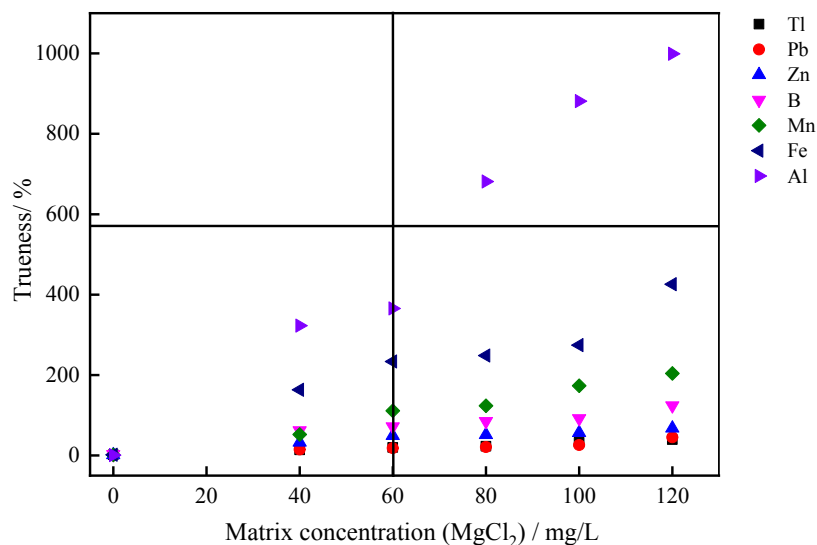

**Fig. S1** Trueness of the metal ion concentrations determined in the presence of different salt matrix concentrations before the desalination device was used

### SI-5 Recoveries of the analytes in the presence of different salt matrices before and after the desalination device was used

Tests were performed at salt matrix concentrations of 40–120 mg/L before the desalination device was used. The highest recovery was 76.10% at a NaCl concentration of 40 mg/L. The lowest recovery was 21.8322% at a MgCl<sub>2</sub> concentration of 120 mg/L.

**Table S4** Recoveries in the presence of NaCl before the desalination device was used

| matrix concentration |    | Recovery % |    |    |    |    |    |    |    |    |    |    |    |    |  |
|----------------------|----|------------|----|----|----|----|----|----|----|----|----|----|----|----|--|
| mg/L                 | Be | B          | Al | Cr | Mn | Fe | Ni | Cu | Zn | As | Cd | Sb | Tl | Pb |  |
| 40                   | 75 | 71         | 74 | 72 | 67 | 73 | 75 | 65 | 74 | 74 | 70 | 73 | 74 | 72 |  |
| 60                   | 66 | 66         | 71 | 61 | 60 | 64 | 69 | 60 | 69 | 63 | 66 | 68 | 64 | 65 |  |
| 80                   | 61 | 51         | 65 | 59 | 54 | 54 | 66 | 52 | 55 | 58 | 54 | 59 | 58 | 58 |  |
| 100                  | 58 | 41         | 61 | 51 | 48 | 49 | 59 | 34 | 50 | 51 | 48 | 51 | 51 | 53 |  |
| 120                  | 40 | 22         | 50 | 44 | 24 | 40 | 52 | 20 | 42 | 46 | 41 | 45 | 48 | 51 |  |

**Table S5 Recoveries in the presence of CaCl<sub>2</sub> before the desalination device was used**

| matrix concentration |    | Recovery % |    |    |    |    |    |    |    |    |    |    |    |    |  |
|----------------------|----|------------|----|----|----|----|----|----|----|----|----|----|----|----|--|
| mg/L                 | Be | B          | Al | Cr | Mn | Fe | Ni | Cu | Zn | As | Cd | Sb | Tl | Pb |  |
| 40                   | 73 | 72         | 66 | 69 | 72 | 69 | 71 | 73 | 62 | 74 | 75 | 68 | 74 | 72 |  |
| 60                   | 64 | 60         | 53 | 63 | 60 | 60 | 64 | 67 | 56 | 69 | 60 | 63 | 69 | 65 |  |
| 80                   | 57 | 53         | 41 | 55 | 57 | 51 | 55 | 60 | 49 | 54 | 59 | 54 | 60 | 58 |  |
| 100                  | 51 | 46         | 31 | 50 | 49 | 36 | 48 | 55 | 34 | 48 | 50 | 48 | 57 | 53 |  |
| 120                  | 44 | 40         | 28 | 49 | 41 | 20 | 41 | 50 | 20 | 41 | 45 | 41 | 50 | 51 |  |

**Table S6 Recoveries in the presence of MgCl<sub>2</sub> before the desalination device was used**

| matrix concentration |    | Recovery % |    |    |    |    |    |    |    |    |    |    |    |    |  |
|----------------------|----|------------|----|----|----|----|----|----|----|----|----|----|----|----|--|
| mg/L                 | Be | B          | Al | Cr | Mn | Fe | Ni | Cu | Zn | As | Cd | Sb | Tl | Pb |  |
| 40                   | 72 | 72         | 66 | 70 | 72 | 66 | 70 | 74 | 63 | 72 | 75 | 66 | 71 | 71 |  |
| 60                   | 62 | 60         | 52 | 63 | 58 | 61 | 66 | 66 | 55 | 69 | 61 | 61 | 69 | 64 |  |
| 80                   | 57 | 53         | 40 | 53 | 51 | 45 | 54 | 59 | 48 | 52 | 56 | 57 | 60 | 57 |  |
| 100                  | 50 | 46         | 34 | 50 | 47 | 31 | 45 | 52 | 36 | 47 | 49 | 48 | 58 | 52 |  |
| 120                  | 45 | 40         | 22 | 46 | 40 | 22 | 40 | 48 | 20 | 40 | 40 | 42 | 51 | 50 |  |

**Table S7 Recoveries in the mix presence of NaCl, MgCl<sub>2</sub> and CaCl<sub>2</sub> after the desalination device was used**

| matrix concentration |     | Recovery % |     |     |     |     |     |     |     |     |     |     |     |     |  |
|----------------------|-----|------------|-----|-----|-----|-----|-----|-----|-----|-----|-----|-----|-----|-----|--|
| 120 mg/L             | Be  | B          | Al  | Cr  | Mn  | Fe  | Ni  | Cu  | Zn  | As  | Cd  | Sb  | Tl  | Pb  |  |
| NaCl <sub>1</sub>    | 107 | 105        | 105 | 106 | 105 | 105 | 105 | 103 | 104 | 103 | 106 | 106 | 106 | 107 |  |
| MgCl <sub>2</sub>    | 99  | 98         | 98  | 94  | 94  | 93  | 96  | 96  | 96  | 99  | 100 | 100 | 93  | 94  |  |
| CaCl <sub>2</sub>    | 94  | 94         | 93  | 88  | 89  | 87  | 92  | 91  | 92  | 97  | 97  | 98  | 87  | 89  |  |

**SI-6 Determination results, RSDs and spike recoveries of real samples measured by iCAP Q with the desalination device****Table S8 Determination results and RSDs of real samples NO.1 with the desalination device**

| Element | 1       | 2       | 3       | 4       | 5       | AVE     | RSD  |
|---------|---------|---------|---------|---------|---------|---------|------|
|         | μg/L    | μg/L    | μg/L    | μg/L    | μg/L    | μg/L    |      |
| 9Be     | 0.013   | 0.013   | 0.013   | 0.014   | 0.013   | 0.014   | 3.61 |
| 11B     | 226.498 | 228.156 | 228.986 | 225.533 | 229.008 | 227.636 | 0.68 |
| 27Al    | 0.756   | 0.752   | 0.748   | 0.784   | 0.758   | 0.760   | 1.85 |
| 52Cr    | 0.331   | 0.329   | 0.328   | 0.348   | 0.327   | 0.333   | 2.67 |
| 55Mn    | 0.035   | 0.035   | 0.035   | 0.036   | 0.035   | 0.035   | 1.44 |
| 57Fe    | 881.561 | 887.124 | 882.688 | 887.307 | 891.276 | 885.991 | 0.44 |



|       |         |         |         |         |         |         |      |
|-------|---------|---------|---------|---------|---------|---------|------|
| 60Ni  | 1.272   | 1.266   | 1.259   | 1.308   | 1.287   | 1.278   | 1.52 |
| 63Cu  | 235.801 | 237.617 | 235.449 | 237.697 | 238.367 | 236.986 | 0.54 |
| 66Zn  | 9.972   | 9.922   | 9.873   | 10.433  | 9.911   | 10.022  | 2.32 |
| 75As  | 4.326   | 4.304   | 4.343   | 4.365   | 4.400   | 4.348   | 0.85 |
| 111Cd | 0.026   | 0.026   | 0.026   | 0.028   | 0.025   | 0.027   | 3.97 |
| 121Sb | 0.205   | 0.204   | 0.206   | 0.213   | 0.203   | 0.207   | 1.87 |
| 205Tl | 0.009   | 0.009   | 0.009   | 0.010   | 0.009   | 0.010   | 1.62 |
| 208Pb | 1.420   | 1.413   | 1.425   | 1.480   | 1.397   | 1.427   | 2.20 |

**Table S9** Determination results and RSDs of real samples NO.2 with the desalination device

| Element | device    |           |           |           |           | AVE<br>μg/L | RSD  |
|---------|-----------|-----------|-----------|-----------|-----------|-------------|------|
|         | 1<br>μg/L | 2<br>μg/L | 3<br>μg/L | 4<br>μg/L | 5<br>μg/L |             |      |
| 9Be     | 0.010     | 0.009     | 0.010     | 0.010     | 0.009     | 0.010       | 1.87 |
| 11B     | 232.797   | 232.663   | 234.757   | 236.136   | 233.482   | 233.967     | 0.63 |
| 27Al    | 0.778     | 0.771     | 0.778     | 0.807     | 0.774     | 0.782       | 1.82 |
| 52Cr    | 0.629     | 0.647     | 0.653     | 0.652     | 0.578     | 0.632       | 5.00 |
| 55Mn    | 873.320   | 871.953   | 879.801   | 880.795   | 882.673   | 877.708     | 0.54 |
| 57Fe    | 845.616   | 846.335   | 853.952   | 852.061   | 851.363   | 849.866     | 0.43 |
| 60Ni    | 4.280     | 4.373     | 4.412     | 4.439     | 4.002     | 4.301       | 4.13 |
| 63Cu    | 706.574   | 704.454   | 710.794   | 712.818   | 715.981   | 710.124     | 0.66 |
| 66Zn    | 19.161    | 21.653    | 19.847    | 20.911    | 19.741    | 20.263      | 4.94 |
| 75As    | 4.706     | 4.714     | 4.756     | 4.881     | 4.589     | 4.729       | 2.22 |
| 111Cd   | 0.026     | 0.025     | 0.026     | 0.027     | 0.025     | 0.026       | 1.87 |
| 121Sb   | 0.791     | 0.797     | 0.804     | 0.820     | 0.762     | 0.795       | 2.69 |
| 205Tl   | 0.007     | 0.007     | 0.007     | 0.007     | 0.006     | 0.007       | 3.77 |
| 208Pb   | 0.414     | 0.402     | 0.406     | 0.429     | 0.430     | 0.416       | 3.12 |

**Table S10** Determination results and RSDs of real samples NO.3 with the desalination device

| Element | desalination device |           |           |           |           | AVE<br>μg/L | RSD  |
|---------|---------------------|-----------|-----------|-----------|-----------|-------------|------|
|         | 1<br>μg/L           | 2<br>μg/L | 3<br>μg/L | 4<br>μg/L | 5<br>μg/L |             |      |
| 9Be     | 0.052               | 0.052     | 0.053     | 0.054     | 0.052     | 0.053       | 1.87 |
| 11B     | 197.825             | 196.836   | 198.608   | 200.182   | 200.646   | 198.819     | 0.80 |
| 27Al    | 2.832               | 2.818     | 2.843     | 2.963     | 2.775     | 2.846       | 2.46 |
| 52Cr    | 0.079               | 0.079     | 0.079     | 0.083     | 0.077     | 0.079       | 3.07 |
| 55Mn    | 343.856             | 342.137   | 345.216   | 350.247   | 346.464   | 345.584     | 0.89 |
| 57Fe    | 881.047             | 880.682   | 888.608   | 890.810   | 886.226   | 885.475     | 0.51 |
| 60Ni    | 2.400               | 2.388     | 2.409     | 2.458     | 2.405     | 2.412       | 1.11 |
| 63Cu    | 14.319              | 14.248    | 14.376    | 14.794    | 14.219    | 14.391      | 1.62 |
| 66Zn    | 4.247               | 4.226     | 4.264     | 4.426     | 4.179     | 4.268       | 2.20 |
| 75As    | 2.251               | 2.240     | 2.260     | 2.387     | 2.174     | 2.262       | 3.42 |
| 111Cd   | 0.057               | 0.057     | 0.058     | 0.060     | 0.056     | 0.058       | 2.80 |
| 121Sb   | 0.081               | 0.081     | 0.082     | 0.086     | 0.077     | 0.082       | 4.07 |

|       |       |       |       |       |       |       |      |
|-------|-------|-------|-------|-------|-------|-------|------|
| 205Tl | 0.008 | 0.008 | 0.008 | 0.008 | 0.008 | 0.008 | 1.87 |
| 208Pb | 0.501 | 0.498 | 0.508 | 0.520 | 0.491 | 0.504 | 2.16 |

**Table S11** Determination results and RSDs of real samples NO.4 with the desalination device

| Element | 1       | 2       | 3       | 4       | 5       | AVE     | RSD  |
|---------|---------|---------|---------|---------|---------|---------|------|
|         | µg/L    | µg/L    | µg/L    | µg/L    | µg/L    | µg/L    |      |
| 9Be     | 0.009   | 0.009   | 0.009   | 0.010   | 0.009   | 0.009   | 1.83 |
| 11B     | 207.586 | 207.139 | 209.003 | 209.684 | 209.735 | 208.630 | 0.58 |
| 27Al    | 0.545   | 0.543   | 0.548   | 0.565   | 0.538   | 0.548   | 1.91 |
| 52Cr    | 0.129   | 0.129   | 0.129   | 0.134   | 0.129   | 0.130   | 1.80 |
| 55Mn    | 29.723  | 29.574  | 29.840  | 31.157  | 29.067  | 29.872  | 2.60 |
| 57Fe    | 381.260 | 379.353 | 382.768 | 383.942 | 388.555 | 383.176 | 0.90 |
| 60Ni    | 3.099   | 3.096   | 3.098   | 3.310   | 2.922   | 3.105   | 4.43 |
| 63Cu    | 474.256 | 474.881 | 476.306 | 478.564 | 479.189 | 476.639 | 0.46 |
| 66Zn    | 27.520  | 27.220  | 27.465  | 28.737  | 27.350  | 27.658  | 2.22 |
| 75As    | 4.373   | 4.351   | 4.307   | 4.536   | 4.408   | 4.395   | 1.98 |
| 111Cd   | 0.031   | 0.031   | 0.031   | 0.033   | 0.030   | 0.031   | 2.99 |
| 121Sb   | 0.107   | 0.106   | 0.109   | 0.111   | 0.105   | 0.108   | 2.40 |
| 205Tl   | 0.007   | 0.007   | 0.007   | 0.008   | 0.007   | 0.008   | 1.87 |
| 208Pb   | 0.291   | 0.287   | 0.299   | 0.312   | 0.284   | 0.295   | 3.86 |

**Table S12** Determination results and RSDs of real samples NO.5 with the desalination device

| Element | 1       | 2       | 3       | 4       | 5       | AVE     | RSD  |
|---------|---------|---------|---------|---------|---------|---------|------|
|         | µg/L    | µg/L    | µg/L    | µg/L    | µg/L    | µg/L    |      |
| 9Be     | 0.010   | 0.010   | 0.010   | 0.010   | 0.010   | 0.010   | 2.39 |
| 11B     | 231.774 | 230.615 | 232.691 | 235.501 | 234.113 | 232.939 | 0.82 |
| 27Al    | 0.521   | 0.532   | 0.537   | 0.544   | 0.486   | 0.524   | 4.37 |
| 52Cr    | 0.272   | 0.269   | 0.271   | 0.282   | 0.271   | 0.273   | 1.83 |
| 55Mn    | 211.987 | 210.927 | 212.825 | 214.757 | 214.765 | 213.052 | 0.80 |
| 57Fe    | 818.859 | 819.221 | 826.594 | 826.265 | 823.929 | 822.974 | 0.45 |
| 60Ni    | 3.924   | 3.905   | 3.940   | 4.070   | 3.881   | 3.944   | 1.87 |
| 63Cu    | 854.769 | 856.478 | 848.232 | 858.152 | 847.538 | 853.034 | 0.57 |
| 66Zn    | 4.710   | 4.796   | 4.839   | 4.885   | 4.438   | 4.734   | 3.75 |
| 75As    | 5.708   | 5.751   | 5.803   | 5.721   | 5.701   | 5.737   | 0.73 |
| 111Cd   | 0.033   | 0.033   | 0.033   | 0.034   | 0.032   | 0.033   | 2.08 |
| 121Sb   | 0.350   | 0.348   | 0.352   | 0.351   | 0.358   | 0.352   | 1.06 |
| 205Tl   | 0.006   | 0.006   | 0.006   | 0.006   | 0.006   | 0.006   | 0.98 |
| 208Pb   | 3.357   | 3.386   | 3.417   | 3.482   | 3.228   | 3.374   | 2.78 |

**Table S13** Determination results of spiked recoveries with the desalination device

| Element | No.1 | No.2 | No.3 | No.4 | No.5 |
|---------|------|------|------|------|------|
|         | µg/L | µg/L | µg/L | µg/L | µg/L |

|       |          |          |          |         |          |
|-------|----------|----------|----------|---------|----------|
| 9Be   | 9.264    | 10.027   | 9.715    | 9.927   | 19.265   |
| 11B   | 707.620  | 711.974  | 684.106  | 711.968 | 727.348  |
| 27Al  | 9.818    | 10.134   | 11.698   | 9.788   | 9.703    |
| 52Cr  | 10.085   | 10.257   | 9.370    | 8.880   | 9.756    |
| 55Mn  | 483.715  | 1368.108 | 840.224  | 525.072 | 698.772  |
| 57Fe  | 1369.204 | 1353.520 | 1407.867 | 889.896 | 1335.285 |
| 60Ni  | 11.064   | 14.272   | 12.362   | 12.878  | 13.738   |
| 63Cu  | 723.506  | 1191.764 | 502.391  | 962.839 | 1323.634 |
| 66Zn  | 18.537   | 29.192   | 13.524   | 37.022  | 13.546   |
| 75As  | 14.339   | 14.109   | 12.055   | 14.173  | 15.614   |
| 111Cd | 9.926    | 10.006   | 9.927    | 9.862   | 10.079   |
| 121Sb | 9.883    | 10.614   | 9.736    | 9.876   | 10.425   |
| 205Tl | 9.274    | 8.993    | 8.905    | 9.406   | 9.430    |
| 208Pb | 10.862   | 10.169   | 9.821    | 10.276  | 13.337   |

**SI-7 Determination results of real sample No.1 measured by EXPEC 7000 with the desalination device**

**Table S14** Determination results and RSDs of real sample No.1 measured inter-devices by EXPEC 7000 with the desalination device

| Element | 1<br>µg/L | 2<br>µg/L | 3<br>µg/L | 4<br>µg/L | 5<br>µg/L | AVE<br>µg/L | RSD  |
|---------|-----------|-----------|-----------|-----------|-----------|-------------|------|
| 9Be     | 0.013     | 0.012     | 0.013     | 0.013     | 0.014     | 0.013       | 3.26 |
| 11B     | 228.712   | 233.614   | 224.361   | 235.167   | 227.451   | 229.861     | 1.94 |
| 27Al    | 0.768     | 0.776     | 0.772     | 0.797     | 0.747     | 0.772       | 2.30 |
| 52Cr    | 0.339     | 0.349     | 0.347     | 0.337     | 0.332     | 0.341       | 2.05 |
| 55Mn    | 0.037     | 0.038     | 0.038     | 0.038     | 0.036     | 0.037       | 2.47 |
| 57Fe    | 887.721   | 897.314   | 892.827   | 881.642   | 901.405   | 892.182     | 0.87 |
| 60Ni    | 1.319     | 1.310     | 1.323     | 1.346     | 1.332     | 1.326       | 1.03 |
| 63Cu    | 237.954   | 247.617   | 235.449   | 239.867   | 234.862   | 239.150     | 2.15 |
| 66Zn    | 10.381    | 10.329    | 10.277    | 10.961    | 10.697    | 10.529      | 2.77 |
| 75As    | 4.580     | 4.557     | 4.498     | 4.641     | 4.739     | 4.603       | 1.99 |
| 111Cd   | 0.025     | 0.024     | 0.024     | 0.026     | 0.026     | 0.025       | 4.12 |
| 121Sb   | 0.212     | 0.211     | 0.213     | 0.218     | 0.211     | 0.213       | 1.35 |
| 205Tl   | 0.010     | 0.011     | 0.010     | 0.010     | 0.010     | 0.010       | 4.21 |
| 208Pb   | 1.452     | 1.424     | 1.437     | 1.513     | 1.469     | 1.459       | 2.37 |

**Table S15** Determination results and RSDs of real sample No.1 measured intra-day by EXPEC 7000 with the desalination device

| Element | 1<br>µg/L | 2<br>µg/L | 3<br>µg/L | 4<br>µg/L | 5<br>µg/L | AVE<br>µg/L | RSD  |
|---------|-----------|-----------|-----------|-----------|-----------|-------------|------|
| 9Be     | 0.015     | 0.015     | 0.015     | 0.014     | 0.015     | 0.015       | 2.98 |
| 11B     | 232.182   | 231.492   | 230.926   | 229.612   | 232.772   | 231.3969    | 0.53 |
| 27Al    | 0.815     | 0.823     | 0.793     | 0.795     | 0.799     | 0.805       | 1.65 |
| 52Cr    | 0.364     | 0.360     | 0.352     | 0.353     | 0.356     | 0.357       | 1.42 |
| 55Mn    | 0.038     | 0.038     | 0.036     | 0.036     | 0.037     | 0.037       | 2.70 |
| 57Fe    | 913.136   | 912.240   | 916.721   | 907.617   | 902.171   | 910.3769    | 0.62 |
| 60Ni    | 1.370     | 1.390     | 1.320     | 1.310     | 1.310     | 1.34        | 2.79 |
| 63Cu    | 239.974   | 242.413   | 245.219   | 245.780   | 246.001   | 243.8774    | 1.07 |
| 66Zn    | 10.973    | 11.080    | 10.244    | 10.437    | 10.791    | 10.705      | 3.31 |
| 75As    | 4.590     | 4.545     | 4.311     | 4.366     | 4.578     | 4.478       | 2.90 |
| 111Cd   | 0.029     | 0.029     | 0.029     | 0.028     | 0.030     | 0.029       | 2.44 |
| 121Sb   | 0.224     | 0.227     | 0.206     | 0.217     | 0.221     | 0.219       | 3.72 |
| 205Tl   | 0.010     | 0.010     | 0.011     | 0.010     | 0.010     | 0.01        | 4.47 |
| 208Pb   | 1.559     | 1.554     | 1.498     | 1.503     | 1.491     | 1.521       | 2.15 |

**Table S16** Determination results and RSDs of real sample No.1 measured inter-day by EXPEC 7000 with the desalination device

| Element | 1<br>µg/L | 2<br>µg/L | 3<br>µg/L | 4<br>µg/L | 5<br>µg/L | AVE<br>µg/L | RSD  |
|---------|-----------|-----------|-----------|-----------|-----------|-------------|------|
| 9Be     | 0.013     | 0.013     | 0.013     | 0.013     | 0.014     | 0.013       | 3.44 |
| 11B     | 228.457   | 227.756   | 225.385   | 226.117   | 226.220   | 226.787     | 0.56 |
| 27Al    | 0.777     | 0.774     | 0.737     | 0.729     | 0.723     | 0.748       | 3.43 |
| 52Cr    | 0.333     | 0.331     | 0.322     | 0.322     | 0.327     | 0.327       | 1.54 |
| 55Mn    | 0.036     | 0.036     | 0.034     | 0.034     | 0.035     | 0.035       | 2.86 |
| 57Fe    | 883.846   | 882.664   | 878.574   | 879.756   | 884.165   | 881.801     | 0.28 |
| 60Ni    | 1.293     | 1.281     | 1.249     | 1.237     | 1.230     | 1.258       | 2.20 |
| 63Cu    | 236.096   | 234.458   | 237.648   | 237.286   | 235.467   | 236.191     | 0.55 |
| 66Zn    | 10.210    | 10.306    | 9.815     | 9.516     | 9.468     | 9.863       | 3.91 |
| 75As    | 4.385     | 4.428     | 4.214     | 4.171     | 4.192     | 4.278       | 2.78 |
| 111Cd   | 0.026     | 0.026     | 0.026     | 0.027     | 0.026     | 0.026       | 1.72 |
| 121Sb   | 0.208     | 0.210     | 0.200     | 0.198     | 0.199     | 0.203       | 2.78 |
| 205Tl   | 0.009     | 0.009     | 0.009     | 0.009     | 0.010     | 0.009       | 4.97 |
| 208Pb   | 1.459     | 1.463     | 1.373     | 1.379     | 1.346     | 1.404       | 3.81 |

## SI-8 Determination results of standard sample CASS-5 measured by EXPEC 7000

### with the desalination device

Note: The 95% confidence interval formula is  $(T - Z_{\alpha/2}\sigma, T + Z_{\alpha/2}\sigma)$ , where T is trueness (%), When confidence level is 95%, the Z value is 1.96,  $\sigma$  is the standard deviation of CASS-5 results.

**Table S17** Determination results and RSDs of standard sample CASS-5 measured inter-devices by EXPEC 7000 with the desalination device

| Element           | 1<br>μg/L | 2<br>μg/L | 3<br>μg/L | 4<br>μg/L | 5<br>μg/L | AVE<br>μg/L | RSD  | Confidence |
|-------------------|-----------|-----------|-----------|-----------|-----------|-------------|------|------------|
| <sup>52</sup> Cr  | 0.107     | 0.108     | 0.107     | 0.108     | 0.108     | 0.108       | 0.61 | ±0.001     |
| <sup>55</sup> Mn  | 2.56      | 2.61      | 2.60      | 2.62      | 2.57      | 2.59        | 1.03 | ±0.05      |
| <sup>57</sup> Fe  | 1.48      | 1.48      | 1.45      | 1.48      | 1.42      | 1.46        | 1.87 | ±0.05      |
| <sup>60</sup> Ni  | 0.326     | 0.317     | 0.311     | 0.329     | 0.322     | 0.321       | 2.25 | ±0.014     |
| <sup>63</sup> Cu  | 0.376     | 0.372     | 0.369     | 0.369     | 0.365     | 0.370       | 1.05 | ±0.008     |
| <sup>66</sup> Zn  | 0.694     | 0.706     | 0.709     | 0.711     | 0.690     | 0.702       | 1.34 | ±0.018     |
| <sup>75</sup> As  | 1.24      | 1.25      | 1.26      | 1.27      | 1.26      | 1.26        | 0.77 | ±0.02      |
| <sup>111</sup> Cd | 0.0229    | 0.0239    | 0.0231    | 0.0241    | 0.0241    | 0.0236      | 2.40 | ±0.0011    |

**Table S18** Determination results and RSDs of standard sample CASS-5 measured intra-day by EXPEC 7000 with the desalination device

| Element           | 1<br>μg/L | 2<br>μg/L | 3<br>μg/L | 4<br>μg/L | 5<br>μg/L | AVE<br>μg/L | RSD  | Confidence |
|-------------------|-----------|-----------|-----------|-----------|-----------|-------------|------|------------|
| <sup>52</sup> Cr  | 0.107     | 0.107     | 0.109     | 0.109     | 0.108     | 0.108       | 0.93 | ±0.002     |
| <sup>55</sup> Mn  | 2.59      | 2.64      | 2.58      | 2.65      | 2.61      | 2.61        | 1.24 | ±0.06      |
| <sup>57</sup> Fe  | 1.45      | 1.50      | 1.44      | 1.42      | 1.44      | 1.45        | 2.09 | ±0.06      |
| <sup>60</sup> Ni  | 0.336     | 0.336     | 0.320     | 0.321     | 0.327     | 0.328       | 2.37 | ±0.015     |
| <sup>63</sup> Cu  | 0.385     | 0.374     | 0.369     | 0.380     | 0.377     | 0.377       | 1.59 | ±0.012     |
| <sup>66</sup> Zn  | 0.722     | 0.731     | 0.700     | 0.701     | 0.726     | 0.716       | 2.03 | ±0.028     |
| <sup>75</sup> As  | 1.29      | 1.26      | 1.30      | 1.27      | 1.24      | 1.27        | 1.72 | ±0.04      |
| <sup>111</sup> Cd | 0.0237    | 0.0238    | 0.0240    | 0.0242    | 0.0243    | 0.0240      | 1.03 | ±0.0005    |

**Table S19** Determination results and RSDs of standard sample CASS-5 measured inter-day by EXPEC 7000 with the desalination device

| Element           | 1<br>μg/L | 2<br>μg/L | 3<br>μg/L | 4<br>μg/L | 5<br>μg/L | AVE<br>μg/L | RSD  | Confidence |
|-------------------|-----------|-----------|-----------|-----------|-----------|-------------|------|------------|
| <sup>52</sup> Cr  | 0.105     | 0.104     | 0.106     | 0.106     | 0.104     | 0.105       | 0.95 | 0.002      |
| <sup>55</sup> Mn  | 2.51      | 2.52      | 2.58      | 2.59      | 2.66      | 2.57        | 2.29 | 0.12       |
| <sup>57</sup> Fe  | 1.39      | 1.38      | 1.44      | 1.46      | 1.54      | 1.44        | 4.32 | 0.12       |
| <sup>60</sup> Ni  | 0.309     | 0.319     | 0.335     | 0.326     | 0.327     | 0.323       | 2.94 | 0.019      |
| <sup>63</sup> Cu  | 0.359     | 0.363     | 0.380     | 0.372     | 0.381     | 0.371       | 2.63 | 0.019      |
| <sup>66</sup> Zn  | 0.693     | 0.689     | 0.733     | 0.715     | 0.666     | 0.699       | 3.67 | 0.050      |
| <sup>75</sup> As  | 1.29      | 1.23      | 1.26      | 1.26      | 1.22      | 1.25        | 2.28 | 0.06       |
| <sup>111</sup> Cd | 0.0236    | 0.0237    | 0.0236    | 0.0241    | 0.0245    | 0.0239      | 1.65 | 0.0008     |
